# Supplementary material for: Modeling the dynamics of oligodendrocyte precursor cells and the genesis of gliomas
Source: PubMed Central journal article supplement (PMC5903643; doi:10.1371/journal.pcbi.1005977), 2018-03-28

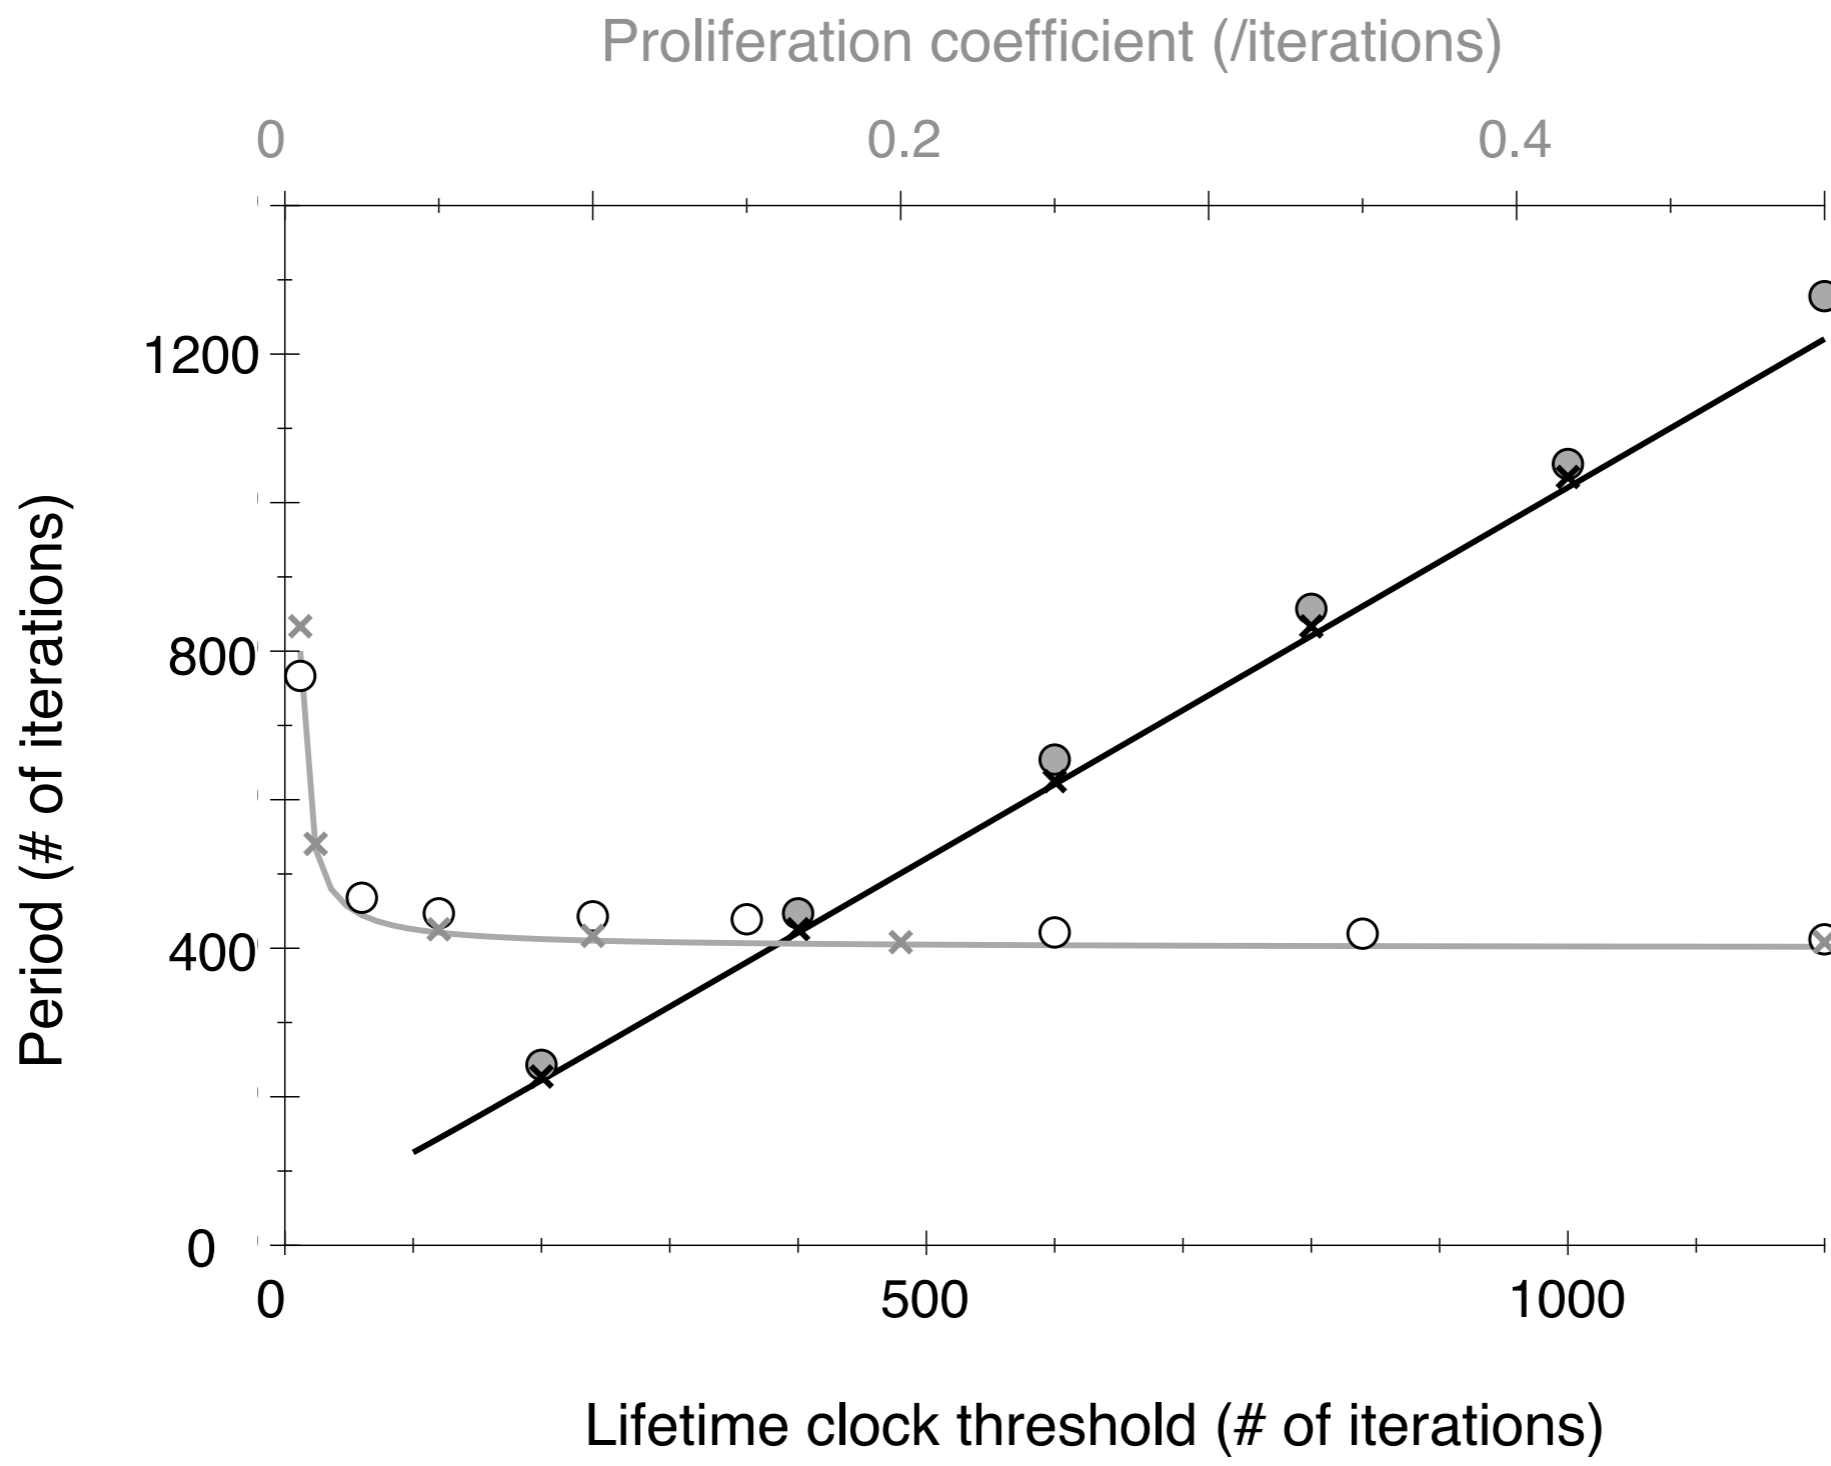

Supplement: pcbi.1005977.s002.pdf [file pcbi.1005977.s002.pdf]
